# Supplementary material for: Genetic Parameters for Limousine Interbeef Genetic Evaluation of Calving Traits
Source: MDPI journal article supplement (doi:10.3390/genes15020216), 2024-02-07
Supplement: s1 [file s1]

# Genetic parameters for Limousine Interbeef genetic evaluation for calving traits

Zdeňka Veselá <sup>1,\*</sup>, Michaela Brzáková <sup>1</sup>, Alexandra Novotná <sup>1</sup>, Luboš Vostrý <sup>1,2</sup>

<sup>1</sup> Department of Genetics and Breeding of Farm Animals, Institute of Animal Science, 104 00 Prague, Czech Republic; mbrzakova781@gmail.com (M.B.); novotna.alexandra@vuzv.cz (A.N.); [vostry@af.czu.cz](mailto:vostry@af.czu.cz) (L.V.)

<sup>2</sup> Faculty of Agrobiological Sciences, Food and Natural Resources, Czech University of Life Sciences Prague, 165 00 Prague, Czech Republic

\* Correspondence: vesela.zdenka@vuzv.cz

Supplementary Materials: Supplementary Tables S1, S2, S3, S4, S5, S6, S7

**Supplementary Table S1.** Definition of calving ease scoring according to country.

| Population | Score            |               |                |                |            |
|------------|------------------|---------------|----------------|----------------|------------|
|            | 1 / 100(CHE)     | 2 / 200 (CHE) | 3 / 300 (CHE)  | 4              | 5          |
| CZE        | no assistance    | easy pull     | hard pull      | c.s.           |            |
| EST        | no assistance    | →             | vet assistance |                |            |
| FRA        | easy             | →             | →              | →              | embryotomy |
| GBR        | no assistance    | easy pull     | hard pull      | vet assistance | c.s.       |
| IRL        | no assistance    | easy pull     | hard pull      | vet assistance |            |
| SVN        | easy             | →             | →              | →              | embryotomy |
| CHE        | hard pull + c.s. | easy pull     | no assistance  |                |            |

CZE–Czech Republic; EST–Estonia; FRA–France; GBR–Great Britain; IRL–Ireland; SVN–Slovenia; CHE–Switzerland

c.s. – cesarean section

**Supplementary Table S2.** Size of performance data-sets (above diagonal) and pedigrees (below diagonal) for pairwise variance components estimation for birth weight.

|            | CZE     | DFS     | FRA     | GBR    | IRL    | SVN    | CHE     |
|------------|---------|---------|---------|--------|--------|--------|---------|
| <b>CZE</b> |         | 51,795  | 43,161  | 30,025 | 23,445 | 17,510 | 64,932  |
| <b>DFS</b> | 92,008  |         | 72,247  | 48,405 | 30,488 | 24,763 | 88,726  |
| <b>FRA</b> | 132,290 | 159,013 |         | 43,348 | 36,707 | 39,673 | 134,695 |
| <b>GBR</b> | 65,055  | 99,582  | 132,250 |        | 33,745 | 27,799 | 59,079  |
| <b>IRL</b> | 50,397  | 65,557  | 116,218 | 75,013 |        | 8,024  | 46,642  |
| <b>SVN</b> | 30,855  | 48,207  | 88,907  | 61,759 | 22,228 |        | 32,731  |
| <b>CHE</b> | 38,695  | 52,995  | 52,444  | 28,648 | 22,599 | 18,699 |         |

CZE–Czech Republic; DFS–Denmark and Finland and Sweden; FRA–France; GBR–Great Britain; IRL–Ireland; SVN–Slovenia; CHE–Switzerland

**Supplementary Table S3.** Size of performance data-sets (above diagonal) and pedigrees (below diagonal) for pairwise variance components estimation for calving ease.

|            | CZE     | DFS     | FRA     | GBR     | IRL    | SVN    | EST    | CHE    |
|------------|---------|---------|---------|---------|--------|--------|--------|--------|
| <b>CZE</b> |         | 60,212  | 42,538  | 35,130  | 41,634 | 15,241 | 23,356 | 27,346 |
| <b>DFS</b> | 108,783 |         | 70,533  | 51,979  | 56,259 | 22,983 | 51,159 | 35,756 |
| <b>FRA</b> | 132,105 | 174,020 |         | 41,642  | 76,128 | 39,497 | 37,737 | 52,241 |
| <b>GBR</b> | 69,340  | 112,947 | 131,243 |         | 60,073 | 33,570 | 37,890 | 27,237 |
| <b>IRL</b> | 97,814  | 117,723 | 210,284 | 134,893 |        | 21,960 | 28,411 | 43,700 |
| <b>SVN</b> | 27,513  | 48,250  | 90,231  | 75,976  | 58,809 |        | 9,353  | 18,131 |
| <b>EST</b> | 43,350  | 94,440  | 99,722  | 87,349  | 71,127 | 18,871 |        | 22,953 |
| <b>CHE</b> | 49,711  | 67,339  | 134,344 | 58,597  | 98,274 | 32,067 | 43,591 |        |

CZE–Czech Republic; DFS–Denmark and Finland and Sweden; FRA–France; GBR–Great Britain; IRL–Ireland; SVN–Slovenia; EST–Estonia; CHE–Switzerland

**Supplementary Table S4.** Weights used for the bending of the full Interbeef correlation matrix.

|     | Direct       |       |       |       |       |       |       |              |       |       |       |       |       |       | Maternal     |       |     |     |       |     |              |       |       |     |     |     |     |  |  |  |  |  |  |  |  |  |  |
|-----|--------------|-------|-------|-------|-------|-------|-------|--------------|-------|-------|-------|-------|-------|-------|--------------|-------|-----|-----|-------|-----|--------------|-------|-------|-----|-----|-----|-----|--|--|--|--|--|--|--|--|--|--|
|     | Birth weight |       |       |       |       |       |       | Calving ease |       |       |       |       |       |       | Birth weight |       |     |     |       |     | Calving ease |       |       |     |     |     |     |  |  |  |  |  |  |  |  |  |  |
|     | CZE          | DFS   | FRA   | GBR   | ILR   | SVN   | CHE   | CZE          | DFS   | FRA   | GBR   | IRL   | SVN   | EST   | CHE          | CZE   | DFS | FRA | GBR   | SVN | CHE          | CZE   | DFS   | FRA | GBR | SVN | CHE |  |  |  |  |  |  |  |  |  |  |
| CZE |              |       |       |       |       |       |       |              |       |       |       |       |       |       |              |       |     |     |       |     |              |       |       |     |     |     |     |  |  |  |  |  |  |  |  |  |  |
| DFS | 2,560        |       |       |       |       |       |       |              |       |       |       |       |       |       |              |       |     |     |       |     |              |       |       |     |     |     |     |  |  |  |  |  |  |  |  |  |  |
| FRA | 2,080        | 2,860 |       |       |       |       |       |              |       |       |       |       |       |       |              |       |     |     |       |     |              |       |       |     |     |     |     |  |  |  |  |  |  |  |  |  |  |
| GBR | 1,700        | 1,820 | 1,700 |       |       |       |       |              |       |       |       |       |       |       |              |       |     |     |       |     |              |       |       |     |     |     |     |  |  |  |  |  |  |  |  |  |  |
| IRL | 2,280        | 2,180 | 2,340 | 3,340 |       |       |       |              |       |       |       |       |       |       |              |       |     |     |       |     |              |       |       |     |     |     |     |  |  |  |  |  |  |  |  |  |  |
| SVN | 1,000        | 1,280 | 1,520 | 1,000 | 1,000 |       |       |              |       |       |       |       |       |       |              |       |     |     |       |     |              |       |       |     |     |     |     |  |  |  |  |  |  |  |  |  |  |
| CHE | 2,380        | 2,500 | 3,020 | 1,740 | 1,760 | 1,240 |       |              |       |       |       |       |       |       |              |       |     |     |       |     |              |       |       |     |     |     |     |  |  |  |  |  |  |  |  |  |  |
| CZE | 9,999        | 1     | 1     | 1     | 1     | 1     | 1     |              |       |       |       |       |       |       |              |       |     |     |       |     |              |       |       |     |     |     |     |  |  |  |  |  |  |  |  |  |  |
| DFS | 1            | 1     | 1     | 1     | 1     | 1     | 1     | 3,020        |       |       |       |       |       |       |              |       |     |     |       |     |              |       |       |     |     |     |     |  |  |  |  |  |  |  |  |  |  |
| FRA | 1            | 1     | 9,999 | 1     | 1     | 1     | 1     | 6,240        | 5,320 |       |       |       |       |       |              |       |     |     |       |     |              |       |       |     |     |     |     |  |  |  |  |  |  |  |  |  |  |
| GBR | 1            | 1     | 1     | 9,999 | 1     | 1     | 1     | 3,120        | 3,460 | 9,040 |       |       |       |       |              |       |     |     |       |     |              |       |       |     |     |     |     |  |  |  |  |  |  |  |  |  |  |
| IRL | 1            | 1     | 1     | 1     | 9,999 | 1     | 1     | 2,940        | 3,260 | 5,600 | 7,180 |       |       |       |              |       |     |     |       |     |              |       |       |     |     |     |     |  |  |  |  |  |  |  |  |  |  |
| SVN | 1            | 1     | 1     | 1     | 1     | 1     | 1     | 1,300        | 1,420 | 1,660 | 1,320 | 1,360 |       |       |              |       |     |     |       |     |              |       |       |     |     |     |     |  |  |  |  |  |  |  |  |  |  |
| EST | 1            | 1     | 1     | 1     | 1     | 1     | 1     | 1,000        | 2,200 | 1,000 | 1,580 | 1,580 | 1,000 |       |              |       |     |     |       |     |              |       |       |     |     |     |     |  |  |  |  |  |  |  |  |  |  |
| CHE | 1            | 1     | 1     | 1     | 1     | 1     | 9,999 | 1,000        | 1,000 | 4,060 | 2,340 | 2,340 | 1,000 | 1,000 |              |       |     |     |       |     |              |       |       |     |     |     |     |  |  |  |  |  |  |  |  |  |  |
| CZE | 9,999        | 1     | 1     | 1     | 1     | 1     | 1     | 9,999        | 1     | 1     | 1     | 1     | 1     | 1     | 1            |       |     |     |       |     |              |       |       |     |     |     |     |  |  |  |  |  |  |  |  |  |  |
| DFS | 1            | 9,999 | 1     | 1     | 1     | 1     | 1     | 1            | 1     | 1     | 1     | 1     | 1     | 1     | 1            | 500   |     |     |       |     |              |       |       |     |     |     |     |  |  |  |  |  |  |  |  |  |  |
| FRA | 1            | 1     | 9,999 | 1     | 1     | 1     | 1     | 1            | 1     | 9,999 | 1     | 1     | 1     | 1     | 1            | 500   | 500 |     |       |     |              |       |       |     |     |     |     |  |  |  |  |  |  |  |  |  |  |
| GBR | 1            | 1     | 1     | 9,999 | 1     | 1     | 1     | 1            | 1     | 1     | 1     | 1     | 1     | 1     | 1            | 500   | 500 | 765 |       |     |              |       |       |     |     |     |     |  |  |  |  |  |  |  |  |  |  |
| SVN | 1            | 1     | 1     | 1     | 1     | 9,999 | 1     | 1            | 1     | 1     | 1     | 1     | 1     | 1     | 1            | 500   | 500 | 500 | 500   |     |              |       |       |     |     |     |     |  |  |  |  |  |  |  |  |  |  |
| CHE | 1            | 1     | 1     | 1     | 1     | 1     | 9,999 | 1            | 1     | 1     | 1     | 1     | 1     | 1     | 9,999        | 500   | 895 | 500 | 760   | 580 |              |       |       |     |     |     |     |  |  |  |  |  |  |  |  |  |  |
| CZE | 9,999        | 1     | 1     | 1     | 1     | 1     | 1     | 9,999        | 1     | 1     | 1     | 1     | 1     | 1     | 1            | 9,999 | 1   | 1   | 1     | 1   | 1            |       |       |     |     |     |     |  |  |  |  |  |  |  |  |  |  |
| DFS | 1            | 1     | 1     | 1     | 1     | 1     | 1     | 1            | 9,999 | 1     | 1     | 1     | 1     | 1     | 1            | 1     | 1   | 1   | 1     | 1   | 1            | 500   |       |     |     |     |     |  |  |  |  |  |  |  |  |  |  |
| FRA | 1            | 1     | 9,999 | 1     | 1     | 1     | 1     | 1            | 1     | 9,999 | 1     | 1     | 1     | 1     | 1            | 1     | 1   | 1   | 9,999 | 1   | 1            | 3,860 | 500   |     |     |     |     |  |  |  |  |  |  |  |  |  |  |
| GBR | 1            | 1     | 1     | 1     | 1     | 1     | 1     | 1            | 1     | 1     | 9,999 | 1     | 1     | 1     | 1            | 1     | 1   | 1   | 1     | 1   | 500          | 500   | 5,920 |     |     |     |     |  |  |  |  |  |  |  |  |  |  |
| SVN | 1            | 1     | 1     | 1     | 1     | 1     | 1     | 1            | 1     | 1     | 1     | 1     | 9,999 | 1     | 1            | 1     | 1   | 1   | 1     | 1   | 500          | 500   | 500   | 500 |     |     |     |  |  |  |  |  |  |  |  |  |  |
| CHE | 1            | 1     | 1     | 1     | 1     | 1     | 9,999 | 1            | 1     | 1     | 1     | 1     | 1     | 1     | 9,999        | 1     | 1   | 1   | 1     | 1   | 9,999        | 500   | 500   | 500 | 500 | 500 |     |  |  |  |  |  |  |  |  |  |  |

CZE–Czech Republic; DFS–Denmark and Finland and Sweden; FRA–France; GBR–Great Britain; IRL–Ireland; SVN–Slovenia; EST–Estonia; CHE–Switzerland

**Supplementary Table S5.** Full Interbeef genetic correlation matrix before bending.

|     | Direct       |       |       |       |      |       |       |              |       |       |       |       |       |       |       | Maternal     |      |      |      |      |       |              |       |       |       |       |     |  |  |
|-----|--------------|-------|-------|-------|------|-------|-------|--------------|-------|-------|-------|-------|-------|-------|-------|--------------|------|------|------|------|-------|--------------|-------|-------|-------|-------|-----|--|--|
|     | Birth weight |       |       |       |      |       |       | Calving ease |       |       |       |       |       |       |       | Birth weight |      |      |      |      |       | Calving ease |       |       |       |       |     |  |  |
|     | CZE          | DFS   | FRA   | GBR   | ILR  | SVN   | CHE   | CZE          | DFS   | FRA   | GBR   | IRL   | SVN   | EST   | CHE   | CZE          | DFS  | FRA  | GBR  | SVN  | CHE   | CZE          | DFS   | FRA   | GBR   | SVN   | CHE |  |  |
| CZE |              |       |       |       |      |       |       |              |       |       |       |       |       |       |       |              |      |      |      |      |       |              |       |       |       |       |     |  |  |
| DFS | 0.70         |       |       |       |      |       |       |              |       |       |       |       |       |       |       |              |      |      |      |      |       |              |       |       |       |       |     |  |  |
| FRA | 0.91         | 0.88  |       |       |      |       |       |              |       |       |       |       |       |       |       |              |      |      |      |      |       |              |       |       |       |       |     |  |  |
| GBR | 0.82         | 0.75  | 0.81  |       |      |       |       |              |       |       |       |       |       |       |       |              |      |      |      |      |       |              |       |       |       |       |     |  |  |
| IRL | 0.82         | 0.88  | 0.85  | 0.87  |      |       |       |              |       |       |       |       |       |       |       |              |      |      |      |      |       |              |       |       |       |       |     |  |  |
| SVN | 0.82         | 0.91  | 0.87  | 0.87  | 0.85 |       |       |              |       |       |       |       |       |       |       |              |      |      |      |      |       |              |       |       |       |       |     |  |  |
| CHE | 0.68         | 0.96  | 0.85  | 0.81  | 0.94 | 0.84  |       |              |       |       |       |       |       |       |       |              |      |      |      |      |       |              |       |       |       |       |     |  |  |
| CZE | 0.25         | 0     | 0     | 0     | 0    | 0     | 0     |              |       |       |       |       |       |       |       |              |      |      |      |      |       |              |       |       |       |       |     |  |  |
| DFS | 0            | 0     | 0     | 0     | 0    | 0     | 0     | 0.83         |       |       |       |       |       |       |       |              |      |      |      |      |       |              |       |       |       |       |     |  |  |
| FRA | 0            | 0     | 0.69  | 0     | 0    | 0     | 0     | 0.62         | 0.70  |       |       |       |       |       |       |              |      |      |      |      |       |              |       |       |       |       |     |  |  |
| GBR | 0            | 0     | 0     | 0.53  | 0    | 0     | 0     | 0.75         | 0.82  | 0.73  |       |       |       |       |       |              |      |      |      |      |       |              |       |       |       |       |     |  |  |
| IRL | 0            | 0     | 0     | 0     | 0.62 | 0     | 0     | 0.78         | 0.78  | 0.80  | 0.65  |       |       |       |       |              |      |      |      |      |       |              |       |       |       |       |     |  |  |
| SVN | 0            | 0     | 0     | 0     | 0    | 0     | 0     | 0.76         | 0.77  | 0.82  | 0.67  | 0.86  |       |       |       |              |      |      |      |      |       |              |       |       |       |       |     |  |  |
| EST | 0            | 0     | 0     | 0     | 0    | 0     | 0     | 0.75         | 0.77  | 0.75  | 0.94  | 0.67  | 0.75  |       |       |              |      |      |      |      |       |              |       |       |       |       |     |  |  |
| CHE | 0            | 0     | 0     | 0     | 0    | 0     | -0.63 | -0.75        | -0.75 | -0.73 | -0.63 | -0.75 | -0.75 | -0.75 |       |              |      |      |      |      |       |              |       |       |       |       |     |  |  |
| CZE | -0.48        | 0     | 0     | 0     | 0    | 0     | 0     | -0.01        | 0     | 0     | 0     | 0     | 0     | 0     | 0     |              |      |      |      |      |       |              |       |       |       |       |     |  |  |
| DFS | 0            | -0.15 | 0     | 0     | 0    | 0     | 0     | 0            | 0     | 0     | 0     | 0     | 0     | 0     | 0     | 0.60         |      |      |      |      |       |              |       |       |       |       |     |  |  |
| FRA | 0            | 0     | -0.61 | 0     | 0    | 0     | 0     | 0            | 0     | -0.20 | 0     | 0     | 0     | 0     | 0     | 0.60         | 0.60 |      |      |      |       |              |       |       |       |       |     |  |  |
| GBR | 0            | 0     | 0     | -0.37 | 0    | 0     | 0     | 0            | 0     | 0     | 0     | 0     | 0     | 0     | 0     | 0.60         | 0.60 | 0.41 |      |      |       |              |       |       |       |       |     |  |  |
| SVN | 0            | 0     | 0     | 0     | 0    | -0.49 | 0     | 0            | 0     | 0     | 0     | 0     | 0     | 0     | 0     | 0.60         | 0.60 | 0.60 | 0.60 |      |       |              |       |       |       |       |     |  |  |
| CHE | 0            | 0     | 0     | 0     | 0    | 0     | -0.72 | 0            | 0     | 0     | 0     | 0     | 0     | 0     | 0.39  | 0.60         | 0.59 | 0.60 | 0.58 | 0.70 |       |              |       |       |       |       |     |  |  |
| CZE | 0.04         | 0     | 0     | 0     | 0    | 0     | 0     | -0.47        | 0     | 0     | 0     | 0     | 0     | 0     | 0     | 0.42         | 0    | 0    | 0    | 0    | 0     |              |       |       |       |       |     |  |  |
| DFS | 0            | 0     | 0     | 0     | 0    | 0     | 0     | 0            | -0.20 | 0     | 0     | 0     | 0     | 0     | 0     | 0            | 0    | 0    | 0    | 0    | 0     | 0.60         |       |       |       |       |     |  |  |
| FRA | 0            | 0     | -0.45 | 0     | 0    | 0     | 0     | 0            | 0     | -0.56 | 0     | 0     | 0     | 0     | 0     | 0            | 0    | 0    | 0.28 | 0    | 0     | 0            | 0.56  | 0.60  |       |       |     |  |  |
| GBR | 0            | 0     | 0     | 0     | 0    | 0     | 0     | 0            | 0     | 0     | -0.35 | 0     | 0     | 0     | 0     | 0            | 0    | 0    | 0    | 0    | 0     | 0.60         | 0.60  | 0.67  |       |       |     |  |  |
| SVN | 0            | 0     | 0     | 0     | 0    | 0     | 0     | 0            | 0     | 0     | 0     | 0     | -0.51 | 0     | 0     | 0            | 0    | 0    | 0    | 0    | 0     | 0.60         | 0.60  | 0.60  | 0.60  |       |     |  |  |
| CHE | 0            | 0     | 0     | 0     | 0    | 0     | 0.24  | 0            | 0     | 0     | 0     | 0     | 0     | 0     | -0.53 | 0            | 0    | 0    | 0    | 0    | -0.24 | -0.60        | -0.60 | -0.60 | -0.60 | -0.60 |     |  |  |

CZE–Czech Republic; DFS–Denmark and Finland and Sweden; FRA–France; GBR–Great Britain; IRL–Ireland; SVN–Slovenia; EST–Estonia; CHE–Switzerland

**Supplementary Table S6.** Full Interbeef matrix after bending: genetic correlations (below diagonal), genetic variances (diagonal), and genetic covariances (above diagonal).

|     | Direct       |       |       |       |       |       |       |              |       |       |       |       |       |       | Maternal     |       |       |       |       |       |              |       |       |       |       |       |       |
|-----|--------------|-------|-------|-------|-------|-------|-------|--------------|-------|-------|-------|-------|-------|-------|--------------|-------|-------|-------|-------|-------|--------------|-------|-------|-------|-------|-------|-------|
|     | Birth weight |       |       |       |       |       |       | Calving ease |       |       |       |       |       |       | Birth weight |       |       |       |       |       | Calving ease |       |       |       |       |       |       |
|     | CZE          | DFS   | FRA   | GBR   | ILR   | SVN   | CHE   | CZE          | DFS   | FRA   | GBR   | IRL   | SVN   | EST   | CHE          | CZE   | DFS   | FRA   | GBR   | SVN   | CHE          | CZE   | DFS   | FRA   | GBR   | SVN   | CHE   |
| CZE | 4.10         | 4.01  | 3.42  | 2.79  | 4.08  | 4.68  | 4.35  | 0.06         | 0.01  | 0.04  | 0.08  | 0.15  | 0.01  | 0.00  | -5.32        | -0.89 | -0.04 | -0.65 | -0.10 | -0.36 | -0.40        | 0.00  | 0.01  | 0.00  | 0.02  | 0.01  | -2.20 |
| DFS | 0.67         | 8.77  | 5.18  | 3.98  | 6.49  | 7.94  | 8.68  | 0.00         | -0.04 | 0.05  | 0.03  | 0.14  | -0.04 | -0.02 | -11.37       | -0.02 | -0.67 | -0.62 | 0.12  | -0.26 | -1.39        | 0.02  | 0.00  | -0.01 | 0.02  | 0.00  | 0.14  |
| FRA | 0.76         | 0.78  | 4.98  | 2.89  | 4.53  | 5.39  | 5.74  | 0.05         | 0.03  | 0.09  | 0.12  | 0.22  | 0.06  | 0.01  | -12.53       | -0.40 | -0.30 | -1.32 | -0.13 | -0.68 | -0.83        | 0.00  | 0.00  | -0.03 | -0.02 | -0.01 | 0.68  |
| GBR | 0.73         | 0.71  | 0.68  | 3.60  | 4.11  | 4.51  | 4.50  | 0.05         | 0.02  | 0.04  | 0.19  | 0.16  | 0.01  | 0.02  | -7.35        | -0.17 | 0.02  | -0.22 | -0.56 | -0.28 | -0.51        | 0.01  | 0.00  | 0.00  | -0.04 | 0.01  | -1.17 |
| IRL | 0.74         | 0.81  | 0.75  | 0.80  | 7.31  | 6.46  | 7.27  | 0.08         | 0.03  | 0.07  | 0.14  | 0.44  | 0.07  | 0.01  | -16.00       | -0.16 | 0.04  | -0.27 | -0.14 | -0.05 | -0.74        | 0.01  | 0.00  | 0.00  | 0.02  | 0.01  | -1.09 |
| SVN | 0.69         | 0.80  | 0.72  | 0.71  | 0.71  | 11.26 | 8.11  | 0.01         | -0.03 | 0.04  | 0.06  | 0.11  | -0.04 | -0.02 | -6.60        | -0.34 | -0.06 | -0.77 | -0.13 | -3.31 | -1.16        | 0.02  | 0.00  | -0.01 | 0.00  | 0.00  | -1.20 |
| CHE | 0.62         | 0.84  | 0.74  | 0.68  | 0.77  | 0.69  | 12.13 | 0.06         | 0.02  | 0.08  | 0.14  | 0.32  | 0.05  | 0.02  | -34.30       | -0.45 | -0.77 | -0.92 | -0.40 | -1.35 | -3.38        | 0.01  | 0.00  | -0.01 | 0.01  | 0.01  | 10.06 |
| CZE | 0.24         | 0.01  | 0.18  | 0.19  | 0.24  | 0.03  | 0.14  | 0.02         | 0.01  | 0.01  | 0.02  | 0.03  | 0.01  | 0.01  | -1.33        | 0.00  | 0.01  | 0.01  | 0.01  | 0.01  | 0.02         | 0.00  | 0.00  | 0.00  | 0.00  | 0.00  | 0.16  |
| DFS | 0.05         | -0.14 | 0.11  | 0.10  | 0.12  | -0.09 | 0.06  | 0.79         | 0.01  | 0.00  | 0.02  | 0.02  | 0.01  | 0.01  | -1.15        | 0.01  | -0.01 | 0.01  | 0.00  | -0.01 | 0.00         | 0.00  | 0.00  | 0.00  | 0.00  | 0.00  | 0.01  |
| FRA | 0.28         | 0.24  | 0.63  | 0.32  | 0.41  | 0.19  | 0.35  | 0.60         | 0.68  | 0.00  | 0.01  | 0.01  | 0.01  | 0.00  | -0.73        | 0.00  | 0.00  | -0.01 | 0.00  | 0.01  | 0.00         | 0.00  | 0.00  | 0.00  | 0.00  | 0.00  | 0.09  |
| GBR | 0.21         | 0.05  | 0.28  | 0.50  | 0.27  | 0.10  | 0.20  | 0.70         | 0.77  | 0.70  | 0.04  | 0.04  | 0.02  | 0.01  | -1.97        | 0.02  | 0.01  | 0.01  | -0.03 | 0.01  | 0.01         | 0.00  | 0.00  | 0.00  | -0.01 | 0.00  | 0.09  |
| IRL | 0.26         | 0.17  | 0.36  | 0.30  | 0.58  | 0.12  | 0.32  | 0.73         | 0.74  | 0.76  | 0.63  | 0.08  | 0.04  | 0.01  | -3.26        | 0.02  | 0.01  | 0.02  | 0.01  | 0.04  | 0.00         | 0.00  | 0.00  | 0.00  | 0.00  | 0.00  | 0.07  |
| SVN | 0.04         | -0.09 | 0.16  | 0.02  | 0.15  | -0.07 | 0.08  | 0.66         | 0.70  | 0.71  | 0.59  | 0.74  | 0.03  | 0.01  | -1.80        | 0.01  | 0.00  | 0.01  | 0.00  | 0.00  | 0.01         | 0.00  | 0.00  | 0.00  | 0.00  | -0.01 | 0.18  |
| EST | 0.01         | -0.11 | 0.10  | 0.14  | 0.04  | -0.07 | 0.07  | 0.65         | 0.74  | 0.64  | 0.82  | 0.60  | 0.66  | 0.00  | -0.71        | 0.00  | 0.00  | 0.00  | 0.00  | 0.00  | 0.00         | 0.00  | 0.00  | 0.00  | 0.00  | 0.00  | 0.02  |
| CHE | -0.15        | -0.23 | -0.33 | -0.23 | -0.35 | -0.12 | -0.58 | -0.61        | -0.63 | -0.68 | -0.58 | -0.68 | -0.62 | -0.63 | 287.3        | -1.46 | -0.14 | -0.54 | -0.42 | -0.53 | 9.50         | 0.10  | 0.03  | 0.08  | 0.07  | 0.13  | -106  |
| CZE | -0.47        | -0.01 | -0.19 | -0.10 | -0.06 | -0.11 | -0.14 | -0.02        | 0.10  | 0.06  | 0.09  | 0.09  | 0.08  | 0.06  | -0.09        | 0.90  | 0.63  | 0.42  | 0.33  | 0.82  | 0.55         | 0.02  | 0.00  | 0.00  | 0.00  | 0.00  | -0.54 |
| DFS | -0.01        | -0.15 | -0.09 | 0.01  | 0.01  | -0.01 | -0.14 | 0.06         | -0.03 | 0.04  | 0.03  | 0.02  | -0.02 | -0.02 | -0.01        | 0.43  | 2.37  | 0.70  | 0.56  | 1.40  | 1.09         | 0.01  | 0.00  | 0.00  | 0.00  | 0.00  | 0.48  |
| FRA | -0.31        | -0.20 | -0.57 | -0.11 | -0.10 | -0.22 | -0.25 | 0.08         | 0.05  | -0.21 | 0.07  | 0.07  | 0.04  | 0.05  | -0.03        | 0.43  | 0.44  | 1.08  | 0.29  | 0.91  | 0.62         | 0.00  | 0.00  | 0.01  | 0.00  | 0.00  | 0.51  |
| GBR | -0.06        | 0.05  | -0.07 | -0.36 | -0.06 | -0.05 | -0.14 | 0.08         | 0.00  | 0.05  | -0.17 | 0.02  | 0.01  | 0.01  | -0.03        | 0.43  | 0.44  | 0.34  | 0.67  | 0.73  | 0.55         | 0.00  | 0.00  | 0.00  | 0.00  | 0.00  | 0.11  |
| SVN | -0.08        | -0.04 | -0.15 | -0.07 | -0.01 | -0.47 | -0.19 | 0.05         | -0.03 | 0.04  | 0.03  | 0.06  | -0.01 | -0.02 | -0.01        | 0.41  | 0.44  | 0.42  | 0.43  | 4.32  | 1.47         | 0.01  | 0.00  | 0.00  | 0.00  | 0.00  | 0.29  |
| CHE | -0.14        | -0.33 | -0.26 | -0.19 | -0.19 | -0.24 | -0.67 | 0.09         | 0.03  | 0.01  | 0.04  | 0.01  | 0.02  | 0.02  | 0.39         | 0.40  | 0.49  | 0.41  | 0.46  | 0.49  | 2.09         | 0.00  | 0.00  | 0.00  | 0.00  | 0.00  | -4.23 |
| CZE | 0.03         | 0.10  | 0.03  | 0.12  | 0.09  | 0.10  | 0.07  | -0.46        | -0.09 | -0.11 | -0.08 | -0.08 | -0.07 | -0.04 | 0.10         | 0.41  | 0.07  | 0.02  | 0.06  | 0.08  | 0.05         | 0.00  | 0.00  | 0.00  | 0.00  | 0.00  | -0.30 |
| DFS | 0.07         | -0.02 | -0.02 | 0.01  | 0.01  | -0.01 | 0.02  | -0.06        | -0.20 | -0.04 | -0.04 | 0.00  | 0.00  | 0.04  | 0.03         | 0.06  | -0.01 | 0.00  | 0.00  | 0.00  | -0.01        | 0.43  | 0.01  | 0.00  | 0.00  | 0.00  | -0.42 |
| FRA | -0.01        | -0.11 | -0.43 | -0.04 | -0.04 | -0.07 | -0.06 | -0.09        | -0.04 | -0.54 | -0.16 | -0.08 | -0.15 | -0.01 | 0.13         | 0.10  | -0.03 | 0.28  | -0.04 | -0.02 | -0.05        | 0.53  | 0.43  | 0.00  | 0.00  | 0.00  | -0.19 |
| GBR | 0.08         | 0.04  | -0.07 | -0.16 | 0.05  | 0.00  | 0.03  | -0.05        | -0.03 | -0.17 | -0.34 | 0.05  | -0.01 | -0.05 | 0.03         | 0.03  | 0.01  | -0.02 | 0.01  | -0.01 | -0.02        | 0.44  | 0.45  | 0.66  | 0.02  | 0.01  | -0.76 |
| SVN | 0.03         | 0.01  | -0.03 | 0.04  | 0.03  | 0.00  | 0.02  | -0.05        | 0.02  | -0.14 | -0.03 | -0.05 | -0.50 | 0.02  | 0.09         | 0.03  | 0.00  | -0.02 | 0.01  | 0.01  | -0.01        | 0.25  | 0.43  | 0.41  | 0.43  | 0.01  | -0.44 |
| CHE | -0.09        | 0.00  | 0.02  | -0.05 | -0.03 | -0.03 | 0.24  | 0.10         | 0.01  | 0.12  | 0.04  | 0.02  | 0.09  | 0.02  | -0.51        | -0.05 | 0.03  | 0.04  | 0.01  | 0.01  | -0.24        | -0.42 | -0.44 | -0.42 | -0.44 | -0.42 | 149.4 |

CZE–Czech Republic; DFS–Denmark and Finland and Sweden; FRA–France; GBR–Great Britain; IRL–Ireland; SVN–Slovenia; EST–Estonia; CHE–Switzerland

**Supplementary Table S7.** Differences of the genetic correlations after bending.

|     | Direct       |       |       |       |       |       |       |              |       |       |       |       |       |       | Maternal     |       |       |       |       |       |              |       |       |       |       |      |     |  |
|-----|--------------|-------|-------|-------|-------|-------|-------|--------------|-------|-------|-------|-------|-------|-------|--------------|-------|-------|-------|-------|-------|--------------|-------|-------|-------|-------|------|-----|--|
|     | Birth weight |       |       |       |       |       |       | Calving ease |       |       |       |       |       |       | Birth weight |       |       |       |       |       | Calving ease |       |       |       |       |      |     |  |
|     | CZE          | DFS   | FRA   | GBR   | ILR   | SVN   | CHE   | CZE          | DFS   | FRA   | GBR   | IRL   | SVN   | EST   | CHE          | CZE   | DFS   | FRA   | GBR   | SVN   | CHE          | CZE   | DFS   | FRA   | GBR   | SVN  | CHE |  |
| CZE |              |       |       |       |       |       |       |              |       |       |       |       |       |       |              |       |       |       |       |       |              |       |       |       |       |      |     |  |
| DFS | -0.02        |       |       |       |       |       |       |              |       |       |       |       |       |       |              |       |       |       |       |       |              |       |       |       |       |      |     |  |
| FRA | -0.11        | -0.09 |       |       |       |       |       |              |       |       |       |       |       |       |              |       |       |       |       |       |              |       |       |       |       |      |     |  |
| GBR | -0.08        | -0.07 | -0.13 |       |       |       |       |              |       |       |       |       |       |       |              |       |       |       |       |       |              |       |       |       |       |      |     |  |
| IRL | -0.03        | -0.06 | -0.08 | -0.08 |       |       |       |              |       |       |       |       |       |       |              |       |       |       |       |       |              |       |       |       |       |      |     |  |
| SVN | -0.11        | -0.14 | -0.15 | -0.18 | -0.14 |       |       |              |       |       |       |       |       |       |              |       |       |       |       |       |              |       |       |       |       |      |     |  |
| CHE | -0.05        | -0.13 | -0.10 | -0.14 | -0.14 | -0.14 |       |              |       |       |       |       |       |       |              |       |       |       |       |       |              |       |       |       |       |      |     |  |
| CZE | -0.02        | 0.01  | 0.18  | 0.19  | 0.24  | 0.03  | 0.14  |              |       |       |       |       |       |       |              |       |       |       |       |       |              |       |       |       |       |      |     |  |
| DFS | 0.05         | -0.14 | 0.11  | 0.10  | 0.12  | -0.09 | 0.06  | -0.04        |       |       |       |       |       |       |              |       |       |       |       |       |              |       |       |       |       |      |     |  |
| FRA | 0.28         | 0.24  | -0.06 | 0.32  | 0.41  | 0.19  | 0.35  | -0.02        | -0.03 |       |       |       |       |       |              |       |       |       |       |       |              |       |       |       |       |      |     |  |
| GBR | 0.21         | 0.05  | 0.28  | -0.03 | 0.27  | 0.10  | 0.20  | -0.05        | -0.05 | -0.03 |       |       |       |       |              |       |       |       |       |       |              |       |       |       |       |      |     |  |
| IRL | 0.26         | 0.17  | 0.36  | 0.30  | -0.04 | 0.12  | 0.32  | -0.05        | -0.04 | -0.04 | -0.02 |       |       |       |              |       |       |       |       |       |              |       |       |       |       |      |     |  |
| SVN | 0.04         | -0.09 | 0.16  | 0.02  | 0.15  | -0.07 | 0.08  | -0.10        | -0.07 | -0.11 | -0.08 | -0.12 |       |       |              |       |       |       |       |       |              |       |       |       |       |      |     |  |
| EST | 0.01         | -0.11 | 0.10  | 0.14  | 0.04  | -0.08 | 0.07  | -0.11        | -0.03 | -0.12 | -0.12 | -0.07 | -0.10 |       |              |       |       |       |       |       |              |       |       |       |       |      |     |  |
| CHE | -0.16        | -0.23 | -0.33 | -0.23 | -0.35 | -0.12 | 0.05  | 0.15         | 0.13  | 0.05  | 0.05  | 0.07  | 0.14  | 0.13  |              |       |       |       |       |       |              |       |       |       |       |      |     |  |
| CZE | 0.02         | -0.01 | -0.19 | -0.10 | -0.06 | -0.11 | -0.14 | -0.01        | 0.10  | 0.06  | 0.09  | 0.09  | 0.08  | 0.06  | -0.09        |       |       |       |       |       |              |       |       |       |       |      |     |  |
| DFS | -0.01        | 0.00  | -0.09 | 0.01  | 0.01  | -0.01 | -0.14 | 0.06         | -0.03 | 0.04  | 0.03  | 0.02  | -0.02 | -0.03 | -0.01        | -0.17 |       |       |       |       |              |       |       |       |       |      |     |  |
| FRA | -0.31        | -0.20 | 0.04  | -0.11 | -0.10 | -0.22 | -0.26 | 0.08         | 0.05  | -0.01 | 0.07  | 0.07  | 0.04  | 0.05  | -0.03        | -0.17 | -0.16 |       |       |       |              |       |       |       |       |      |     |  |
| GBR | -0.06        | 0.05  | -0.07 | 0.01  | -0.06 | -0.05 | -0.14 | 0.08         | 0.00  | 0.05  | -0.17 | 0.02  | 0.01  | 0.01  | -0.03        | -0.17 | -0.16 | -0.07 |       |       |              |       |       |       |       |      |     |  |
| SVN | -0.09        | -0.04 | -0.15 | -0.07 | -0.01 | 0.02  | -0.19 | 0.06         | -0.03 | 0.04  | 0.03  | 0.06  | -0.01 | -0.02 | -0.02        | -0.19 | -0.16 | -0.18 | -0.17 |       |              |       |       |       |       |      |     |  |
| CHE | -0.14        | -0.33 | -0.26 | -0.19 | -0.19 | -0.24 | 0.05  | 0.09         | 0.03  | 0.01  | 0.04  | 0.01  | 0.02  | 0.02  | 0.00         | -0.20 | -0.10 | -0.19 | -0.12 | -0.21 |              |       |       |       |       |      |     |  |
| CZE | -0.01        | 0.10  | 0.03  | 0.12  | 0.09  | 0.10  | 0.07  | 0.02         | -0.09 | -0.11 | -0.08 | -0.08 | -0.07 | -0.05 | 0.10         | -0.01 | 0.07  | 0.02  | 0.06  | 0.08  | 0.05         |       |       |       |       |      |     |  |
| DFS | 0.07         | -0.02 | -0.02 | 0.01  | 0.01  | -0.01 | 0.02  | -0.06        | 0.00  | -0.04 | -0.04 | 0.00  | 0.00  | 0.05  | 0.03         | 0.06  | -0.01 | 0.00  | -0.01 | 0.00  | -0.01        | -0.17 |       |       |       |      |     |  |
| FRA | -0.01        | -0.11 | 0.02  | -0.04 | -0.04 | -0.07 | -0.06 | -0.09        | -0.04 | 0.02  | -0.16 | -0.08 | -0.15 | -0.01 | 0.13         | 0.10  | -0.03 | 0.00  | -0.04 | -0.03 | -0.06        | -0.03 | -0.17 |       |       |      |     |  |
| GBR | 0.08         | 0.04  | -0.07 | -0.17 | 0.05  | 0.00  | 0.03  | -0.05        | -0.03 | -0.17 | 0.01  | 0.05  | -0.01 | -0.05 | 0.03         | 0.03  | 0.01  | -0.02 | 0.01  | -0.01 | -0.02        | -0.16 | -0.15 | -0.02 |       |      |     |  |
| SVN | 0.04         | 0.01  | -0.03 | 0.04  | 0.03  | 0.00  | 0.02  | -0.05        | 0.02  | -0.14 | -0.03 | -0.05 | 0.01  | 0.03  | 0.09         | 0.03  | 0.00  | -0.02 | 0.01  | 0.01  | -0.02        | -0.07 | -0.17 | -0.19 | -0.17 |      |     |  |
| CHE | -0.09        | 0.00  | 0.03  | -0.05 | -0.03 | -0.03 | 0.00  | 0.10         | 0.01  | 0.12  | 0.04  | 0.02  | 0.09  | 0.02  | 0.02         | -0.05 | 0.03  | 0.04  | 0.01  | 0.01  | 0.00         | 0.18  | 0.16  | 0.18  | 0.16  | 0.18 |     |  |

CZE–Czech Republic; DFS–Denmark and Finland and Sweden; FRA–France; GBR–Great Britain; IRL–Ireland; SVN–Slovenia; EST–Estonia; CHE–Switzerland
